# Supplementary material for: Bioinformatic Analysis Revealing Independent Predictors of Poor Prognosis and Immunologic/Metastatic Behaviors in Squamous Cell Lung Cancer
Source: Research Square preprint supplement (doi:10.21203/rs.3.rs-2065273/v1), 2022-09-16
Supplement: Supplementary file 1 [file 3881e306906ccfb115da19b0.docx]

**Table S3** Details of EMT gene sets used for the GSVA.

| **Cell_type** | **Included_genes** |
| --- | --- |
| AIGNER_ZEB1_TARGETS | CD24, CDH1, CDH11, CDH3, CDH4, CLDN7, CRB3, CXADR, DMKN, DSC2, DSP, EPCAM, EPPK1, F11R, GJB2, GJB3, INADL, MAL2, MARVELD2, MPZL2, MUC1, OCLN, PCDH7, PKP3, PMEPA1, PPL, SCEL, SFN, SH3YL1, SHROOM3, SYTL1, TACSTD2, TMEM30B, TSPAN1, TSPAN15 |
| ALONSO_METASTASIS_DN | AKAP13, BCL2L10, CCBP2, CDH10, CX3CL1, CYP19A1, CYP7B1, EDN2, EPS15, FOXO1, GIMAP6, IDS, IFI44L, LFNG, LOC148145, LRRC2, NTF4, OLIG2, PAPPA, PCDH9, REST, RGPD1, SECISBP2, TCOF1, TOB2, WNT2 |
| ALONSO_METASTASIS_EMT_DN | CDH10, EDN2, PAPPA, PCDH9, WNT2 |
| ALONSO_METASTASIS_EMT_UP | ANLN, APLP2, CD63, CDH2, CLIC4, CTSB, CX3CR1, DSG2, EDNRB, EMP1, ENC1, ENOPH1, FGG, FZD1, HMMR, ITGAV, LUM, MFAP1, MMP2, PFN1, PRKCA, RAB1A, RAN, RRAGA, SDCBP, SEPP1, SERPINA3, SMARCA1, SPA17, SPARC, TUBA1A, TUBA3C, TUBA3D, TUBA4A, TUBB3, VCAN |
| ALONSO_METASTASIS_NEURAL_UP | AKT1S1, APLP2, CD63, CHN1, EMP1, ENC1, ENOPH1, KIT, MAGEA6, MAL, MITF, PDGFRA, PMP22, PTPRZ1, S100A10, SDCBP, SEPP1, SETX |
| ALONSO_METASTASIS_UP | ACADM, ACSL3, ADK, ADSL, AK4, AKR7A2, AKT1S1, ALDH1A2, ANLN, ANO6, APEX1, APLP2, ARID5B, ASH2L, ATL3, ATP5L2, ATP6V0B, ATP6V0D1, BCCIP, BRK1, BTF3, BZW1, C11orf10, C14orf142, C1orf212, C22orf32, C2orf28, C7orf42, CA9, CASP5, CAV1, CBFB, CCT5, CCT6P1, CD63, CDC5L, CDH2, CDKN1A, CDYL, CGA, CHCHD1, CHCHD2, CKS1B, CLIC4, COX6B1, COX8A, CTSB, CX3CR1, CXCL12, CYC1, DAD1, DCAF13, DCK, DHRS11, DSG2, DUSP12, EDNRB, EIF1B, EIF3H, EIF5, EMP1, ENC1, ENO1, ENOPH1, EPB41L3, EXOC2, FAIM, FAM114A1, FGG, FHL1, FZD1, GABARAP, GGH, GHITM, GLO1, GNG12, GOLT1A, GRB2, GSTA4, GTF2H2, HBXIP, HIBADH, HIST1H3D, HIST1H4B, HIST1H4C, HMMR, HSPA8, HSPB1, IDE, IFITM2, IGFBP1, IL1RL1, ITGAV, KIAA1279, KIF11, KLF10, LAPTM4A, LHFPL2, LIPA, LRPAP1, LUM, MAGEA6, MAL, MAP4K3, MAPRE1, MDH1, MDM2, METTL13, MFAP1, MMADHC, MMGT1, MMP2, MRPL15, MRPL37, MRPS22, MYB, NCOA4, NDUFAB1, NDUFB11, NDUFB3, NHP2, NME2, NPC2, PAICS, PCID2, PDE5A, PFKM, PFN1, PLA2G16, PMM1, PMP22, POLR3K, PPP1R3C, PPP1R8, PPP2CB, PPP2R5C, PRDX5, PRKAR1A, PRKCA, PTPRZ1, RAB1A, RABAC1, RAN, RBM4, RCBTB2, RNASE4, RPL10A, RPL35A, RPS10, RRAGA, S100A10, SCD, SDCBP, SDHD, SEMA5A, SEPP1, SERINC2, SERPINA3, SET, SHB, SKP1, SLC25A17, SLC25A33, SLC30A6, SLC38A9, SMARCA1, SPA17, SPARC, SPCS1, SRI, STK24, TCEB1, TDG, TGFBR2, TIMM10, TMBIM4, TMCO1, TMEM199, TMEM50B, TMEM9B, TP53I3, TUBA1A, TUBA3C, TUBA3D, TUBA4A, TUBB3, TXNRD1, UBE2D2, UBL5, VBP1, VCAN, VDAC1, VKORC1, WBP5, WEE1, XRCC5, YWHAQ, ZNHIT3 |
| ANASTASSIOU_MULTICANCER_INVASIVENESS_SIGNATURE | ACTA2, ADAM12, AEBP1, ASPN, BGN, C1QTNF3, C7orf10, CDH11, COL10A1, COL11A1, COL1A1, COL1A2, COL3A1, COL5A1, COL5A2, COL6A2, COL6A3, COMP, COPZ2, CRISPLD2, CTSK, DCN, EDNRA, EPYC, FAP, FBN1, FN1, GLT8D2, GREM1, INHBA, ITGBL1, LGALS1, LOX, LOXL2, LRRC15, LUM, MFAP5, MMP11, MMP2, MXRA5, NID2, NOX4, NTM, NUAK1, OLFML2B, PCOLCE, PDGFRB, PLAU, POSTN, PRRX1, RAB31, RCN3, SERPINF1, SFRP4, SNAI2, SPARC, SPOCK1, SULF1, THBS2, THY1, TIMP3, TMEM158, TNFAIP6, VCAN |
| BEGUM_TARGETS_OF_PAX3_FOXO1_FUSION_AND_PAX3 | FN1, ID4, JAG1, NR2F1, PSTPIP2, PTHLH, TOX |
| BEGUM_TARGETS_OF_PAX3_FOXO1_FUSION_DN | AJAP1, BCL2L1, BIN1, BMP1, BMP4, CARD10, CD70, CFD, COL5A1, CPEB1, DGKD, DKK3, EPHA2, EPHB2, F2RL1, FLNB, GADD45B, GCNT1, ID1, IL11, ITGA3, ITGB4, JAG2, KCNG1, KIT, KLF10, LBH, MAFB, MYC, NTM, PDLIM4, SEMA3B, SERPINE1, SH3BP4, SMAD9, SOX9, STEAP3, THBS2, TIMP3, TNC, TNFRSF12A, TPD52L1, VDR, VEGFA, WNT11 |
| BEGUM_TARGETS_OF_PAX3_FOXO1_FUSION_UP | ACADL, ADAMTS1, ADAMTS5, AUTS2, CALCRL, CDYL, CFHR1, CITED1, CLSTN2, CNR1, DACH1, DMD, DPYD, EPHA4, FARS2, GNAS, GNG11, GOLIM4, GPM6A, ID4, KAT6B, KITLG, LGR5, LIFR, LMO4, LRRN3, LTBP1, MAN1A1, MAP2K5, MDFIC, NR2F1, NT5E, OMD, PBX1, PCDH17, PCDH7, PEG10, PERP, PITX2, PLN, PLSCR4, PLXNC1, PRKAR2B, PTPRG, SCAMP1, SCML1, SEMA3C, SGK1, SH3GLB1, SLIT2, SLIT3, STK17B, STX11, TMEFF1, TPBG, TPK1, TUBB1, TWSG1, VAV3, ZNF75D |
| BIOCARTA_MTA3_PATHWAY | ALDOA, CDH1, CTSD, ESR1, GAPDH, HDAC1, HSPB1, HSPB2, MBD3, MTA1, MTA3, PDZK1, SNAI1, SNAI2, TUBA1A, TUBA1C, TUBA3C, TUBA4A, TUBA4B |
| EPITHELIAL_TO_MESENCHYMAL_TRANSITION | BMP2, BMP7, CTNNB1, HGF, HNRNPAB, S100A4, TGFB1, TGFB2, TGFB3, TRIM28 |
| GO_CARDIAC_EPITHELIAL_TO_MESENCHYMAL_TRANSITION | ADAM15, BMP2, EFNA1, ERG, FGF8, HAS2, HEY1, HEY2, HEYL, MSX1, MSX2, NOTCH1, OLFM1, RBPJ, RTN4, SMAD4, SNAI1, SNAI2, TGFB2, TGFBR1, TGFBR3, TMEM100, WNT16, WNT2 |
| GO_EPITHELIAL_TO_MESENCHYMAL_TRANSITION | ADAM15, AMELX, BMP2, BMP7, CTNNB1, CUL7, EFNA1, EOMES, EPB41L5, ERG, FAM101B, FAM83D, FGF8, FGFR2, FOXF2, GSC, GSK3B, HAS2, HEY1, HEY2, HEYL, HGF, HIF1A, HMGA2, HNRNPAB, LEF1, LIMS1, LOXL2, LOXL3, LRP6, MSX1, MSX2, NOG, NOTCH1, OLFM1, PAX3, RBPJ, RTN4, S100A4, SFRP1, SMAD4, SNAI1, SNAI2, SOX9, TGFB1, TGFB2, TGFBR1, TGFBR3, TMEM100, TRIM28, WNT11, WNT16, WNT2, WNT4, WNT5A, WNT8A |
| GO_EPITHELIAL_TO_MESENCHYMAL_TRANSITION_INVOLVED_IN_ENDOCARDIAL_CUSHION_FORMATION | FGF8, HEY1, HEYL, MSX1, MSX2, NOTCH1, RBPJ, SMAD4, SNAI1, SNAI2, TMEM100 |
| GO_MESENCHYMAL_TO_EPITHELIAL_TRANSITION | BASP1, BMP4, CITED1, FZD7, GATA3, GDNF, GREM1, PAX2, PAX8, SALL1, SIX2, SMO, TCF15, WNT4, WT1 |
| GO_NEGATIVE_REGULATION_OF_EPITHELIAL_TO_MESENCHYMAL_TRANSITION | BMP5, C18orf1, DAB2IP, DACT3, EFNA1, FOXA1, FOXA2, FUZ, HPN, MAD2L2, NKX2-1, OVOL2, PBLD, PPP2CA, SDHAF2, SFRP1, SFRP2, SMAD7, STRAP, TBX5, TGFB2, TRIM62, VASN |
| GO_POSITIVE_REGULATION_OF_EPITHELIAL_TO_MESENCHYMAL_TRANSITION | AGER, ALX1, AXIN2, BAMBI, BCL9L, BMP2, C13orf15, COL1A1, CRB2, CTNNB1, DAB2, EPB41L5, EZH2, GCNT2, GLIPR2, HDAC2, LEF1, NOTCH1, OLFM1, SDCBP, SERPINB3, SMAD2, SMAD3, SMAD4, SNAI1, TCF7L2, TGFB1, TGFB1I1, TGFB2, TGFB3, TGFBR2, TWIST1, WWTR1, ZNF703 |
| GO_REGULATION_OF_EPITHELIAL_TO_MESENCHYMAL_TRANSITION | AGER, ALX1, AXIN2, BAMBI, BCL9L, BMP2, BMP5, C13orf15, C18orf1, CLASP1, CLASP2, COL1A1, CRB2, CTNNB1, DAB2, DAB2IP, DACT3, DAG1, EFNA1, ELL3, EPB41L5, EPHA3, EZH2, FAM195B, FOXA1, FOXA2, FUZ, GCNT2, GLIPR2, GREM1, HDAC2, HPN, LEF1, MAD2L2, NKX2-1, NOTCH1, OLFM1, OVOL2, PBLD, PHLDB1, PHLDB2, POFUT2, PPP2CA, SDCBP, SDHAF2, SERPINB3, SFRP1, SFRP2, SMAD2, SMAD3, SMAD4, SMAD7, SNAI1, STRAP, TBX5, TCF7L2, TGFB1, TGFB1I1, TGFB2, TGFB3, TGFBR1, TGFBR2, TRIM62, TWIST1, VASN, WWTR1, ZNF703 |
| GOTZMANN_EPITHELIAL_TO_MESENCHYMAL_TRANSITION_DN | ABCB1, ABCD3, ACADL, ACADM, AHCY, AIP, ALAD, AMD1, ANXA11, ANXA7, ANXA8L2, AP2A2, AQP8, ARF4, ARHGDIB, ATF2, ATP5B, ATP5G1, ATP6V1A, ATP6V1E1, BAX, BCAP31, BNC1, BTC, C17orf81, CALM2, CAPZA2, CASP3, CASP4, CBX1, CCRN4L, CCT3, CD53, CD55, CD82, CDH1, CDKN1A, CDKN2A, CFTR, CLCN3, CLNS1A, CNIH, COPS5, CPE, CPT2, CRIP1, CTNNB1, CX3CL1, CXCL1, CXCL6, CYP2J2, CYP3A7, DBP, DDOST, DDX19A, DDX24, DMBT1, DOK1, ECH1, EDN2, EGR1, ENPP1, EPS15, EPS8, EXOC7, EYA2, FDFT1, FGFBP1, FHL1, FKBP2, FNTA, FOS, FOSL1, FOXA2, FXYD5, GAS8, GATA5, GDI2, GJA1, GJB4, GNA11, GNAI1, GNB5, GPD1, GSS, GSTM1, GSTP1, H3F3A, HAX1, HCCS, HELLS, HMBS, HMGA2, HMMR, HNRNPH1, HOXA9, HS3ST1, HSD17B10, ID2, IER2, IL1R1, IL1RN, ITGB4, ITIH2, IVL, KCNAB1, KLF3, KLF4, KLRAP1, KRT15, KRT19, LBP, LGALS3, LGALS9, LOR, MAN1A1, MAPK14, MMP13, MRC1, MRPL23, MTHFD2, MXI1, MYC, NFKBIA, NPEPPS, NTAN1, OSTF1, PA2G4, PAM, PDCD2, PENK, PFKL, PFN1, PHYH, PIGF, PIGQ, PLXNA2, POLR1D, POLR2C, PPARG, PPFIBP2, PPP1CB, PRKACB, PRKG2, PSMC1, PSMC5, PSME1, PTHLH, PTPRM, PTPRR, PURA, RAB18, RALY, RNF2, ROCK1, RPL18, S100A13, S100A8, SCP2, SDC4, SDF2, SEC22B, SEC23A, SEPHS2, SEPP1, SERPINB6, SERPINE2, SLC12A1, SLC1A5, SLC22A18, SLC35A1, SLC3A2, SLC9A3R1, SNAP23, SOD1, SOS1, SPRR1A, SRP14, SRSF1, STAC, STIP1, STK3, STOM, TCEA1, TCEA3, TFAM, TKT, TLE1, TM4SF1, TMEM165, TNNT2, TOB1, TOP2A, TP53, TPD52, TPM3, TRIM25, UBE2H, UCP2, UFD1L, VDAC1, WT1, XRN2, YWHAH, YWHAZ, ZFP36L1 |
| GOTZMANN_EPITHELIAL_TO_MESENCHYMAL_TRANSITION_UP | ACTA2, BRCA1, CCL2, CCL7, CCT6A, CDH2, CENPA, CHEK1, CHRNB1, CLU, COL18A1, COL1A1, COL3A1, COL4A1, COL4A2, COL5A2, CSF1, CTGF, CTSL1, CYP1B1, DCK, EDN1, FBLN2, FN1, FURIN, GADD45B, GATA2, GLG1, HMGB1, IGFBP7, IL4R, INHBA, INHBB, IRGM, ITGB1, JUN, LY75, MAP4, MCM3, MKI67, MPDZ, NCAM1, NR2F1, OAT, ODC1, PAFAH1B1, PDGFA, PKP1, PLA2G4A, PLK4, PPIC, PROS1, RBBP6, RBL1, RPSA, S100A6, SERPINE1, SMAD1, SMARCD1, SNAI1, TEAD2, TGFB3, TIMP1, TIMP3, TNC, TOP1, TPP2, TRAF3, ZFX |
| JECHLINGER_EPITHELIAL_TO_MESENCHYMAL_TRANSITION_DN | ACTN4, AMD1, ARHGEF1, ATF3, ATP1A1, BCL6, BMP4, BTG2, CA2, CDH1, CHKA, CIAO1, CTGF, CTNND1, CTSH, CYP2F1, DUSP1, EGR1, EGR2, EPCAM, F3, FBP2, FLNA, FOS, FOSB, FZD8, GRB7, HMGA2, HMMR, ID1, ID2, ID4, INMT, IRF6, ITGB5, ITPR1, JUP, KITLG, KLF10, KLF2, KRT14, MYH9, NNT, NR4A1, NRP1, NUMB, PADI2, PC, PKP1, PLK2, POLR2A, PRKCZ, RARA, SAT1, SERPINB5, SGK1, STAT5A, TGFB3, TGM2, THBS1, TIAM1, TIMP3, TSC22D1, VAMP8, ZFP36, ZNF239 |
| JECHLINGER_EPITHELIAL_TO_MESENCHYMAL_TRANSITION_UP | ADA, ADSSL1, ASNS, B2M, BCL3, CCK, CCL2, CD68, CDH15, CDH2, CFH, COL3A1, COL6A1, COL6A2, CSN3, CTSB, CTSZ, CXCL1, CXCL6, CXCR7, CYP1B1, DAB2, DCN, DDR2, FMO1, GALK1, GAS1, GBP4, HIF1A, HSPG2, HTRA1, IFIT1, IFIT3, IFITM3, IL11, INHBA, IRF7, ISG15, LAMB1, MMP12, MMP13, MMP2, MTHFD2, PCOLCE, PDGFRA, PDGFRB, PHGDH, PLA2G7, PMP22, PPIC, PROCR, PTGS1, PTHLH, PTPN22, RNASET2, RRAS, S100A8, SDC1, SDC2, SERPINH1, SLC3A2, SLPI, SNAI1, SPARC, SRM, STAT1, TNC, TNXB, UPP1, VIM, VLDLR |
| LEF1_UP.V1_DN | ACSF2, ACSL5, AGR2, AIM1, AKR1C3, ALCAM, ALDH5A1, ANK3, ANKFY1, AP1M2, ATP1B1, ATP2A1, ATP8A1, BDH2, BDKRB2, BTN3A3, C1orf115, C4BPB, C5orf45, C9orf86, CAT, CCL20, CDH17, CDK3, CDX2, CFTR, CLEC2D, CNN3, COCH, CPE, CPOX, CTGF, CTSH, CXCL2, CXCL5, CYP1B1, CYP26B1, CYP2J2, DAPK1, DDX58, DECR1, DISC1, DIXDC1, DMXL2, DPP4, DPYSL3, DYNC2LI1, EFHD1, EFNB2, EHF, EHMT2, ELF3, ELL3, ENC1, ENTPD3, ERAP2, ERN2, FAM134B, FAM172A, FAM59A, FAM83E, FBXL15, FGFBP1, FOXA1, FPGT, GALC, GALNT12, GATA6, GDE1, GDPD3, GRB14, GSPT2, GSTM3, HAUS4, HCFC1R1, HDHD1, HERC6, HNF1B, HOXB13, ID1, ID3, IL17RB, IL18, IL20RA, IL33, KCNQ1, KCNV1, KDM5D, KIAA0319L, KIAA0485, KIT, KLRC3, KLRF1, KRT20, LGR5, LIMCH1, MANBA, MANEA, MANSC1, MARCH2, MDFIC, MEF2C, MFGE8, MGC12488, MLLT3, MOCOS, MOSC1, MST1P9, MVP, MXD3, MYRIP, NLRP2, NME3, NSUN6, NUDT18, NUDT6, OAS1, OAS3, OLR1, OPN3, OSGEPL1, PAK1, PAPSS2, PCP4, PDGFC, PDGFRL, PDZK1IP1, PF4, PIAS3, PITX2, PLAC8, PLLP, PLOD2, PLSCR4, PROS1, PRR15L, PRSS1, PRSS8, PTPN13, RAB25, RAB26, RAB27B, RAC2, RBM47, RBP4, RHOBTB2, RNF144A, RRAGB, S100A14, SAMD9, SCG5, SEC31B, SELENBP1, SEMA3F, SEPP1, SH3BGRL, SH3GL2, SLC1A1, SLC22A18, SLC24A1, SLC44A4, SLC6A20, SMAD4, SMPDL3A, SORL1, STAT4, SULT1C2, TCEAL1, TEX14, TFF1, TLR3, TM4SF1, TMED3, TMEM135, TMEM144, TMEM14A, TMEM53, TMPRSS3, TNFSF15, TNNC1, TNS3, TPM1, TRAF3IP2, TRPM4, TSPAN1, TSPAN8, USP18, VILL, XK, ZNF711 |
| LEF1_UP.V1_UP | ADAM19, ADAMTS8, AKAP12, ALLC, ANO1, APOBEC3G, ARC, ARG2, ARHGAP4, ARID3B, AUTS2, AXL, BMP7, C10orf116, C13orf15, C14orf132, CARD9, CBS, CCND2, CCR7, CD302, CDA, CDKN2A, CEACAM21, CHGB, CHST10, CHST11, CHST2, COL6A1, COL9A3, CRABP2, CRIP1, CST7, CTH, CXCR2, CXCR4, CYBRD1, DBN1, DCLK1, DENND1C, DHRS2, DKK1, DKK4, DLL3, DNAJC6, EDAR, EGR2, EGR3, ELK3, ELOVL5, EMP1, EMP3, EMR2, EN2, EPB41L4A, ERVMER34-1, FADS1, FBXO17, FGF13, FGF3, FGF9, FHL1, FJX1, FLNC, FN1, FNBP1, FNDC4, FOSL1, FOXF2, FOXG1, G0S2, GATA3, GJB1, GNAL, GNG11, GNG4, GPR64, GZMB, HAS2, HBA2, HEY2, HOXB2, HSPA1A, IGFBP6, IGFBP7, IL11, INHBE, ISYNA1, KCNG1, KCNJ12, KCNN4, KCTD12, KRT13, KRT23, KRT5, KRT76, KRT81, L1CAM, LCK, LGALS1, LINC00341, LMO2, LOXL1, LPL, LTBP2, MAOA, MAOB, MAP1B, MAP7D3, MFAP2, MIA, MLN, MPP6, MSN, MYL9, NELL2, NES, NMNAT2, NR3C1, NRIP1, NRIP3, NTSR1, OBSL1, PARVB, PAX6, PCSK1N, PCSK5, PDGFA, PDLIM4, PDZD2, PELI2, PHLDA3, PLEKHF1, PLEKHO1, PLTP, PMEPA1, PRF1, PRKAA2, PRKCDBP, PRPH, PRPS1, PTGDS, PTPRN2, RAI2, RAMP2, RBP1, ROR2, RPP25, RRAGD, RUNX3, RYR1, S100A2, S100A3, S100A4, SCML1, SCN5A, SERPINE1, SH2D2A, SLC17A9, SLC26A4, SLC2A3, SLC43A3, SLC5A3, SLC6A8, SLIT1, SPRR2B, STC2, STRA6, TCEA2, TCHH, TGM2, TH, TM4SF5, TMEM158, TMEM22, TMEM47, TMOD1, TNFRSF1B, TREML2, TRIM48, TRPV2, TRPV6, TUBB2B, TULP2, VIM, WASF3, WNT5A, WT1, WWC2, ZAP70, ZFPM2, ZNF134, ZNF22, ZNF236, ZNF350 |
| LIEN_BREAST_CARCINOMA_METAPLASTIC | ACAN, ADAMTS5, COL16A1, COL18A1, EDIL3, HOXA7, HTRA3, IGF2, IQCA1, KCNE4, LUM, MCAM, MMP16, MSX1, MXRA8, P4HB, PDGFA, PDGFRA, PKD2, POSTN, PPP1R12A, PRRX1, RARRES2, RUNX1T1, SFRP2, SFRP4, SPARC, STAG2, TBX2, THBS1, THBS2, TIMP3, TMEM217, TPM3, TPM4 |
| LIEN_BREAST_CARCINOMA_METAPLASTIC_VS_DUCTAL_DN | ABAT, ABCC11, ACOT4, ACOX2, AGR2, AGR3, AP1M2, AR, ARSD, AZGP1, BIK, BPIFB1, C10orf116, C11orf52, C17orf28, C1orf172, C20orf103, CA12, CCDC125, CDH1, CEACAM6, CLDN7, COX6C, CREB3L4, CST6, CYP4Z1, DACH1, DHCR24, DNAJC12, DNALI1, DYNLRB2, EFHD1, ELF4, ELL3, EPCAM, EPN3, EPPK1, ERBB2, ESR1, FBXL16, FOXA1, FRZB, FSIP1, FXYD3, GATA3, GRHL2, GSTM3, HCAR1, HRASLS2, IFI44L, IGJ, IL20RA, INPP5J, ITGAD, KIAA1324, KIAA1370, KLHDC9, KRT18, KRT18P55, KRT19, LRRC17, MAL2, MANEAL, MB, MMEL1, MTL5, MUCL1, MYB, MYO5C, NAT1, NME5, NPDC1, OVOL2, P2RY2, PHOSPHO2, PIP, PLA2G16, PLEKHA6, PRR15L, PRR5-ARHGAP8, PTGER3, REEP5, REEP6, RET, RSPH1, RTN4RL1, SCGB1D1, SCGB1D2, SCGB2A1, SCGB2A2, SERTAD4, SFRP4, SLC25A4, SLC9A3R1, SPDEF, SPINT2, STK16, TBC1D9, TFF3, THRSP, TMEM125, TMEM25, TOM1L1, TPD52, TRPS1, TSTD1, TTC39A, VAV3, XBP1, ZDHHC11, ZFP62, ZG16B, ZNF552, ZSCAN16 |
| LIEN_BREAST_CARCINOMA_METAPLASTIC_VS_DUCTAL_UP | ADM, ADORA2B, ANGPTL4, ANKH, ARNTL2, BCAT1, BCL2A1, BMP2, CALU, CDH19, CEBPB, COL27A1, COL9A1, COL9A3, CSDA, CSPG4, CTSZ, CYP26B1, DAZL, EFNB1, ENPP2, EYA1, FABP5, FAM126A, FAM127A, FAM129B, FAM176A, FERMT1, FJX1, FLNA, FOXC1, FOXD1, FOXL2, G0S2, GABRA5, GAL, GLT25D1, GNAI1, GOLT1B, GPM6B, HAPLN1, HAS2, HMOX1, HORMAD1, HRCT1, HRH1, ICAM1, IGF2BP2, IGF2BP3, IL1R2, IL6, IL8, KIF14, LARP6, LEPREL1, LOC84856, LRRC8C, MSN, MYC, NMT2, NT5DC2, OCA2, PCOLCE2, PDIA2, PLA2G4A, PLAGL1, PLOD1, PLOD2, PRNP, PTX3, RTEL1, S100A3, S100B, SOD2, SRD5A1, SRSF12, SULT1B1, TEX12, TMEM158, TNFRSF11B, TNFRSF12A, UPP1, VIM |
| MISHRA_CARCINOMA_ASSOCIATED_FIBROBLAST_DN | BDNF, C1S, CAT, CD24, CD55, CTSA, FTL, HGF, HSPA1A, ID2, JUP, KRT14, KRT18, KRT19, KRT7, KRT8, MAN2B1, MET, MFAP4, MGST1, RARRES2, SFRP2, SPINT2, TCEAL1 |
| MISHRA_CARCINOMA_ASSOCIATED_FIBROBLAST_UP | BEX5, CA12, CCL2, COL6A1, COL6A2, CTHRC1, CTSK, EGR1, FGR, FOS, FXYD3, GEM, HBA2, KRT17, MMP9, PDGFA, PDGFRB, PLAU, RAB3B, SESN2, TCN1, THY1, TMEM156, TNC |
| NADELLA_PRKAR1A_TARGETS_DN | ACTA2, ATL1, CDH2, ETS1, HMGA2, LEF1, SNAI2, TWIST2 |
| NADELLA_PRKAR1A_TARGETS_UP | CDH1, CDH3, CDH4, HNRNPAB, SNAI1, SNAI3, TJP1, TRIM28, TWIST1 |
| REACTOME_TGF_BETA_RECEPTOR_SIGNALING_IN_EMT_EPITHELIAL_TO_MESENCHYMAL_TRANSITION | ARHGEF18, CGN, F11R, FKBP1A, LOC731429, PARD3, PARD6A, PRKCZ, RHOA, RPS27A, RPS27AP11, SMURF1, TGFB1, TGFBR1, TGFBR2, UBA52 |
| SARRIO_EPITHELIAL_MESENCHYMAL_TRANSITION_DN | ACSL1, ACTA1, ADH1C, ALG6, ANK3, ANXA8L2, AQP3, ATF3, ATP1A3, BCL6, BIRC3, BNIP3L, BTG1, C13orf15, C16orf57, C1orf63, C1orf74, C1S, CA2, CALD1, CAPZB, CCL21, CCL3, CCNB2, CCNG1, CD9, CDH1, CDKN1C, CFB, CITED2, CLU, CREG1, CTSD, CXCL1, CXCL3, CYBRD1, CYP4B1, DAPK1, DLG5, DSC2, DSC3, DSP, DST, EEF2, EFNA1, EGR1, EIF4B, ENG, ERRFI1, F11R, FBXO32, FGFBP1, FOSL2, FXYD3, GADD45G, GAGE8, GALNTL2, GAS1, GBP2, GEM, GLUD1, HIST1H2AC, HIST2H2BE, HLA-E, IFI16, IFI44, IFITM2, IFITM3, IFNGR1, IL1R1, IL1RN, INSIG1, KLF6, KLRC3, KLRK1, KRT13, KRT14, KRT16, KRT19, KYNU, LAMB2, LETM1, LOC727820, LPAR6, MAFB, MALAT1, MAOA, MAP3K5, MKNK2, MME, MMP25, MVP, MXI1, NCK1, NEAT1, NFE2L1, NFE2L2, NFIL3, NFKBIA, PC, PCDH9, PDZK1IP1, PIK3C2B, PLEKHO2, PLXNB1, PNRC1, POLR3E, PSAP, PSME1, PTEN, RARRES1, RGS2, RNF145, ROS1, RPL37, RPLP1, RPS19BP1, S100A8, SAA2, SAT1, SCD, SCPEP1, SDCBP, SEMA3B, SEMA3C, SEPP1, SERPINA3, SNCAIP, SND1, SOD2, SPRR1B, SPRR3, SRSF8, STAT3, STOM, TACSTD2, TCF3, TFPI, TGFBR3, THBS3, TKT, TMEM59, TNFAIP3, TP53INP1, TP63, TRIM29, TSC22D3, UBE2H, USP15, VAV3, VNN1, ZBTB16, ZCCHC6, ZNF608 |
| SARRIO_EPITHELIAL_MESENCHYMAL_TRANSITION_UP | AGAP1, AKAP2, ANKRD1, ANLN, ARPC1B, ARPC5L, ASF1B, ASPM, BARD1, BCL2L11, BLM, BRCA1, BRIX1, BUB1, C16orf61, C7orf68, C9orf140, C9orf30, CALM3, CAMK2N1, CCNA2, CCNB1, CCT4, CD164, CDC45, CDC6, CDC7, CDCA5, CDCA7, CDK1, CDK2, CDK2AP1, CENPA, CENPE, CENPW, CEP55, CIT, CKS1B, CORT, CPT1A, CRLF3, CRY1, CYP2A13, DCK, DHFR, DIAPH3, DSCC1, DTL, E2F1, ECT2, EIF1AD, EIF5A2, ENC1, ENO1, ENOPH1, ESPL1, ETV1, EXO1, F3, FABP5, FBXO41, FBXO5, FGF2, FHL2, FJX1, FOSL1, GDA, GGCT, GMNN, H2AFX, H2AFY, HELLS, HIST1H4B, HIST1H4C, HIST1H4J, HMMR, HOXC13, HSPE1, IDH2, IGFBP3, KIF11, KIF23, KNTC1, LOC100507424, LOC729082, LRRC8C, MAD2L1, MBOAT7, MCM2, MCM3, MCM4, MCM5, MCM6, MCM7, MFHAS1, MKI67, MLF1IP, MMP14, MSH2, MT2A, MYBL1, NDC80, NT5E, NUP155, ODC1, ORAOV1, ORC6, PAK6, PCNA, PGK1, PHF19, PHLDA1, PKMYT1, PLAUR, PLCG2, PLEK2, PLK1, PLK4, POLD3, POLR3K, PRC1, PRIM1, PRR4, RAD51, RAD51B, RBL1, RBM14, RECQL4, RELT, RFC2, RFC3, RFC4, RFC5, RRM2, RRS1, RTEL1, RUNX1, SDF2L1, SERPINB2, SERPINE2, SH3KBP1, SKA3, SLC20A1, SMTN, SRXN1, STAMBPL1, STEAP1, STIL, STK17A, STMN1, TACC3, TFDP1, TGFB2, TIMM10, TMPO, TNFRSF10A, TNFRSF12A, TNK1, TOP2A, TUBA1A, TUBA8, TUBB, TUBB3, TUBB4B, TUBBP5, TUBG1, TYMS, UBE2S, UBE2T, UCK2, UGGT2, UHRF1, VCAN, VDAC1P2, VEGFC, YEATS4, YRDC, YWHAH, ZNF367, ZWINT |
| SINGH_KRAS_DEPENDENCY_SIGNATURE_ | ADAM8, AMPD3, AREG, C1orf116, C6orf141, CLDN7, DAPP1, FAM83A, FGFBP1, LAD1, LAMA3, LAMC2, MAOA, MST1R, PRSS22, SDR16C5, SEMA4B, SH2D3A, TGFA, TMEM45B |
| ZHANG_TARGETS_OF_EWSR1_FLI1_FUSION | ADO, AK4, ARHGEF1, ATF5, ATP1A1, CAV1, CAV2, CCBL1, CCK, CCND1, CD1E, CD79A, CD99, CDH11, CDK14, CEBPB, CES1, CHN2, CITED2, CRIP2, CSNK1E, CSPG5, CSRP1, DAPK1, DPYSL2, EGR2, FADS1, FCGRT, FNBP1, FOS, G0S2, GABARAPL1, GLCE, GLG1, GPSM3, GRK5, GYG2, HES1, HIPK1, HLA-E, HOXD9, ID2, IFITM1, IGFBP4, IL1RAP, IPO13, JAK1, KDSR, LOC100170939, LY96, MAN2A2, MAPT, ME1, MSX1, MYC, MYO10, NELL2, NPTXR, OLFM1, PFKP, PPFIA3, PRKCB, PSEN1, RAP1GAP, RCOR1, RHOH, RNF113A, RUNX3, SEL1L3, SH2B3, SIRPA, SLC17A7, SLC1A4, SMARCC1, SORD, ST6GAL1, STARD13, STAT6, STEAP1, SYT1, TRIM2, UAP1, UBXN7, VWA5A, WDR47, WNT5A, XPNPEP1, ZDHHC3 |
