# Supplementary material for: Bioinformatic Analysis Revealing Independent Predictors of Poor Prognosis and Immunologic/Metastatic Behaviors in Squamous Cell Lung Cancer
Source: Research Square preprint supplement (doi:10.21203/rs.3.rs-2065273/v1), 2022-09-16
Supplement: Supplementary file 2 [file bf9c1d341c130a9cb7ce0e0e.docx]

**Table S1** Basic clinicopathological characteristics of LUSC patients in the TCGA, GSE30219, and GSE37745 databases.

|  | **TCGA (%)** | **GSE30219 (%)** | **GSE37745 (%)** |
| --- | --- | --- | --- |
| Age: Median (IQR) | 68 (11.25) | 63(12.5) | 66.5(10) |
| Gender |  |  |  |
| Female | 124 (26.7) | 4 (6.9) | 20 (30.3) |
| Male | 341 (73.3) | 54 (93.1) | 46 (69.7) |
| Smoking status |  |  |  |
| Yes | 438 (96.3) | -- | -- |
| No | 17 (3.7) | -- | -- |
| T stage |  |  |  |
| T1 | 111 (23.9) | 47(81) | -- |
| T2 | 278 (59.8) | 4 (6.9) | -- |
| T3 | 69 (14.8) | 4 (6.9) | -- |
| T4 | 7 (1.5) | 3 (5.2) | -- |
| N stage |  |  |  |
| N0 | 306 (65.8) | 49 (84.5) | -- |
| N1 | 121 (26.0) | 8 (13.8) | -- |
| N2 | 33 (7.1) | 1 (1.7) | -- |
| N3 | 5 (1.1) | -- | -- |
| TNM stage |  |  |  |
| I | 243 (52.3) | -- | 40 (60.6) |
| II | 157 (33.7) | -- | 15 (22.7) |
| III | 65 (14.0) | -- | 11 (16.7) |
